# Supplementary material for: Structural and physical properties of a new reversible and continuous thermochromic ionic liquid in a wide temperature interval: [BMIM]4[Ni(NCS)6]
Source: Royal Society of Chemistry journal article supplement (doi:10.1039/c8nj03294g), 2018-01-01
Supplement: c8nj03294g1.pdf [file c8nj03294g1.pdf]

## Electronic Supplementary Information (ESI) for New Journal of Chemistry

This journal is © The Royal Society of Chemistry and the Centre National de  
la Recherche Scientifique 2018

### Structural and physical properties of a new reversible and continuous thermochromic ionic liquid in a wide temperature interval: $[\text{BMIM}]_4[\text{Ni}(\text{NCS})_6]$

Elena López Lago,<sup>a</sup> Julio A. Seijas<sup>b</sup>, Imanol de Pedro<sup>c</sup>, Jesús Rodríguez Fernández<sup>c</sup>, M. Pilar Vázquez-Tato<sup>b</sup>,  
Jesús Antonio González<sup>c</sup>, Esther Rilo<sup>d</sup>, Luisa Segade<sup>d</sup>, Oscar Cabeza<sup>d</sup>, Carlos Damián Rodríguez Fernández<sup>a</sup>,  
Yago Arosa<sup>a</sup>, Bilal S. Algnamat<sup>a</sup>, Luis M. Varela<sup>a</sup>, Jacobo Troncoso<sup>e</sup>, Raúl de la Fuente<sup>a</sup>

<sup>a</sup>Nanomaterials, Photonics and Soft Matter Group (NaFoMat). Departamento de Física Aplicada e Departamento de Física de Partículas. Universidade de Santiago de Compostela. Campus Vida. 15782 Santiago de Compostela. Galicia, Spain.

<sup>b</sup>Departamento de Química Orgánica, Facultade de Ciencias, Universidade de Santiago de Compostela, Campus Lugo, 27080 Lugo, Spain.

<sup>c</sup>CITIMAC, Facultad de Ciencias, Universidad de Cantabria, 39005 Santander, Spain.

<sup>d</sup>Departamento de Física e Ciencias da Terra, Universidade da Coruña, 15071, A Coruña, Spain.

<sup>e</sup>Departamento de Física Aplicada, Universidad de Vigo, Escola de Enxeñaría Aeronáutica e do Espazo, Campus As Lagoas, 32004 Ourense, Spain.

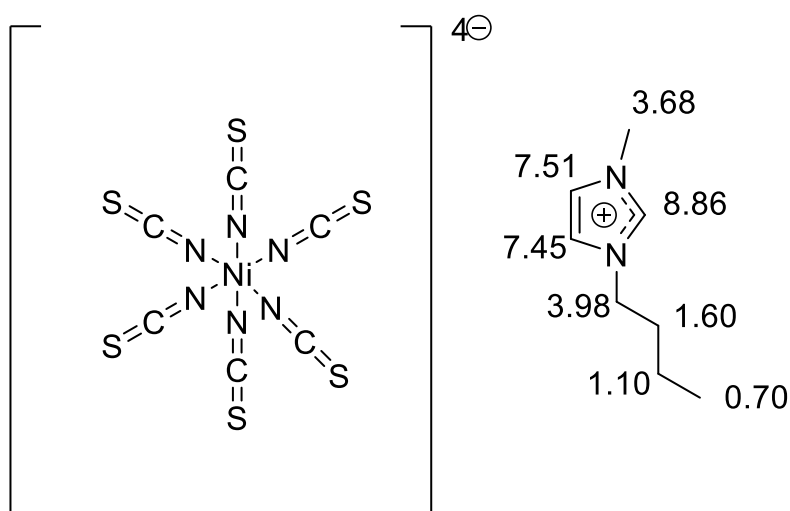

Fig. S1:  $^1\text{H}$  NMR assignments

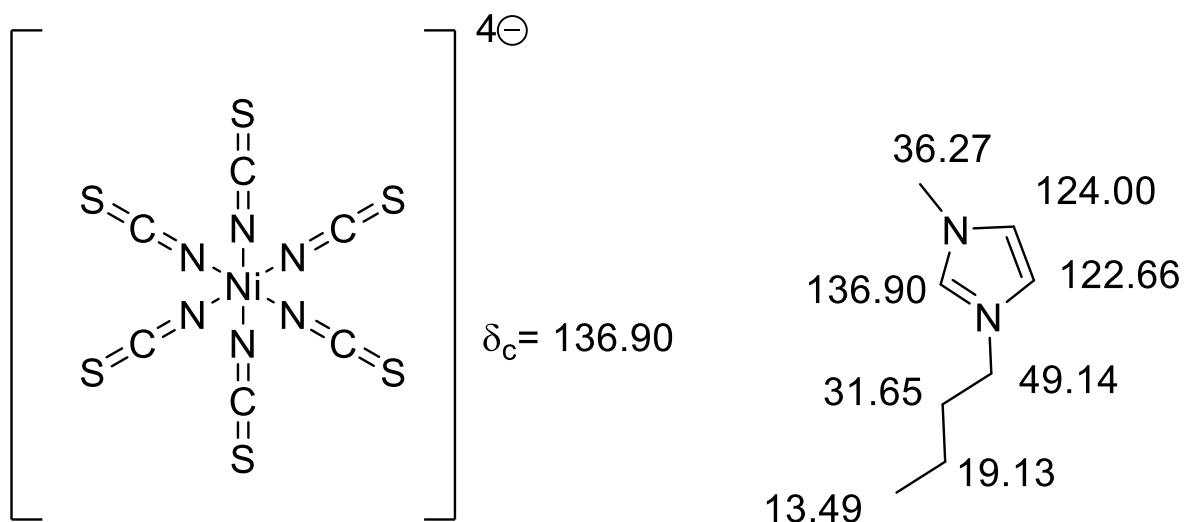

**Fig. S2**  $^{13}C$  NMR assignments

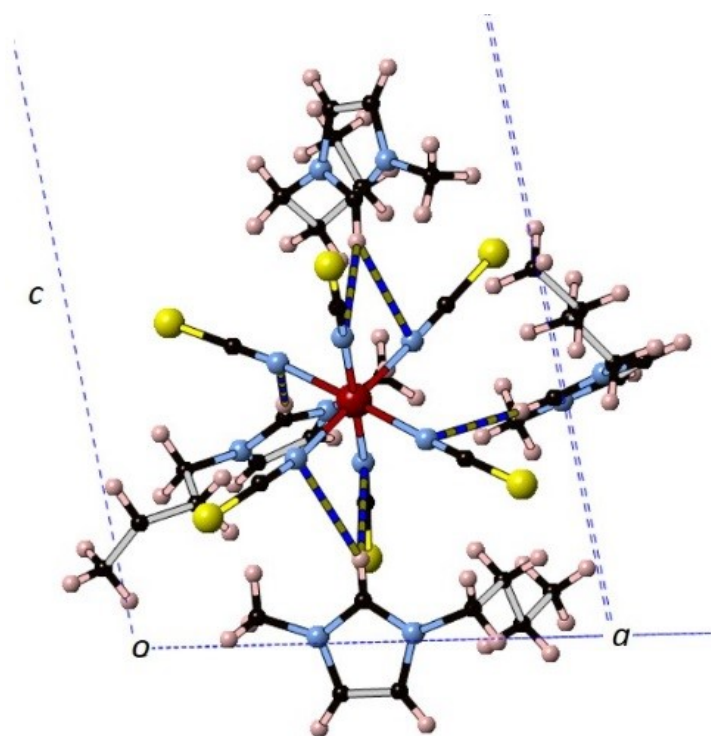

**Fig. S3:** Hydrogen bond interactions (dashed line) around  $[Ni(SCN)_6]^-$  entity.

**Table S1:** Vibrational assignment (cm<sup>-1</sup>) of Niquel (300 K) (sh-shoulder)

| Assignment                                                                                          | Raman 300 K<br>Frequency<br>(cm <sup>-1</sup> ) | IR 295 K<br>Frequency<br>(cm <sup>-1</sup> ) | Assignment                                                               | Raman 300 K<br>Frequency<br>(cm <sup>-1</sup> ) | IR 295 K<br>Frequency<br>(cm <sup>-1</sup> ) |
|-----------------------------------------------------------------------------------------------------|-------------------------------------------------|----------------------------------------------|--------------------------------------------------------------------------|-------------------------------------------------|----------------------------------------------|
| Ni-N sym-stretch                                                                                    | 98.2                                            |                                              |                                                                          |                                                 |                                              |
| Ni-N asym-Stretch                                                                                   | 215.0                                           |                                              |                                                                          |                                                 |                                              |
| CH3(N) bend, CH2(N) bend,<br>CCCC bend                                                              | 318.7<br>337.2<br>414.4                         | 408.9<br>416.6<br>449.37                     | [Ring] ip asym stretch, CCCC<br>stretch, CH3(N) CH2(N) CN<br>stretch     |                                                 | 1326.9                                       |
| SCN-Ni-NCS stretch                                                                                  |                                                 | 468.4                                        | [CH3(N)] stretch, [CH2(N)]<br>stretch, [Ring] ip sym stretch             | 1343.4                                          | 1342.3                                       |
|                                                                                                     | 471.6<br>499.6                                  | 476.4<br>491.8                               | CH3(N) CH2(N) CN str                                                     |                                                 | 1359.7                                       |
| [Ring] op asym bend, N-CH3<br>stretch                                                               | 599.8                                           | 601.7                                        | CCCC stretch                                                             | 1389.7                                          | 1388(sh)                                     |
| [Ring] op asym bend, N-CH3<br>stretch                                                               | 621.0                                           | 619.1                                        | [Ring] ip asym stretch, [Ring]<br>N-CH3 stretch                          | 1412.9<br>1416.2<br>1425.9                      | 1409(sh)<br>1415(sh)<br>1425.3               |
| [Ring] op asym bend<br>CH3(N),CH2(N) str                                                            |                                                 | 643.6<br>665 (sh)                            | [butyl] H-C-H sym bend                                                   | 1453.8<br>1475.5                                | 1453.4<br>1469(sh)<br>1475(sh)               |
| [Ring] ip asym bend, N-CH-N<br>bend                                                                 | 704.2<br>744.0                                  | 702<br>744.5                                 | [Ring] ip asym stretch, [CH3(N)]<br>CN stretch,<br>[CH2(N)] CHstretch    | 1567.0                                          | 1573.5                                       |
| [CH3(N)] stretch, [CH2(N)]<br>stretch, CCCC stretch                                                 | 763.6<br>781.0                                  | 765.7                                        | [Ring] ip asym stretch, [CH3(N)]<br>HCH stretch,<br>[CH2(N)] HCH stretch |                                                 | 1613.3                                       |
| CCCH bend                                                                                           |                                                 | 796.5                                        | [SCN] C-N stretch                                                        | 2063.6<br>2099.1<br>2103.7<br>2121.6            | 2063(sh)<br>2094.5<br>2104(sh)<br>2121(sh)   |
| CCCC stretch                                                                                        |                                                 |                                              |                                                                          |                                                 |                                              |
| [Ring]HCCH asym bend<br>C-S stretch                                                                 |                                                 |                                              | [CH2C(N)], terminal CH3 sym<br>stretch                                   | 2819.8                                          | 2821(sh)                                     |
| [SCN] S-C stretch                                                                                   | 821.2                                           | 773                                          | [Bu] H-C-H sym stretch                                                   | 2872.9                                          | 2869.8                                       |
| NC(H)N bend                                                                                         |                                                 | 844.2                                        | Butyl H-C-H asym str                                                     |                                                 | 2918(sh)                                     |
| CCH bend                                                                                            |                                                 |                                              | [CH3(N)] H-C-H sym stretch                                               | 2932.8                                          | 2931.6                                       |
| NC(H)N bend                                                                                         |                                                 | 877.5                                        | [butyl] H-C-H asym stretch                                               | 2961.7                                          | 2956.6                                       |
| NH bending out of plane                                                                             |                                                 | 904.5                                        | [CH2C(N)] H-C-H asym stretch                                             | 3006.0                                          | 3010(sh)                                     |
| CCCC H bend                                                                                         |                                                 |                                              | [CH3(N)] H-C-H asym stretch                                              | 3074.9                                          | 3068.2                                       |
| In plane ring vibration,<br>stretching and bending;<br>First overtone, 2Xδ(NCS) in<br>plane bending |                                                 | 943.1                                        | [CH3(N)] H-C-H asym stretch                                              | 3089.4                                          | 3082                                         |
|                                                                                                     |                                                 |                                              | [Ring] HC=CH asym stretch                                                | 3140.9                                          | 3146.4                                       |
| CCCC stretch                                                                                        |                                                 | 977.8                                        | [Ring] HC=CH sym stretch,<br>[Ring] ip sym stretch                       | 3154.0                                          | -                                            |
| NC(H)N CH bend                                                                                      |                                                 | 987.5                                        |                                                                          |                                                 |                                              |
| CCCC stretch, [Ring] ip asym<br>stretch                                                             | 1016.7<br>1026.9<br>1051.5<br>1058.9            | -<br>1026<br>1051.1<br>1062.7                |                                                                          |                                                 |                                              |
| [Ring] ip sym stretch, [Ring]<br>C=C stretch                                                        | 1091.4                                          | 1089.7                                       |                                                                          |                                                 |                                              |
| [CH3(N)] H-C-H bend                                                                                 | 1114.6                                          | 1114.8<br>1124.4                             |                                                                          |                                                 |                                              |
| [CH3(N)] stretch, [CH2(N)]<br>stretch, [Ring] ip asym stretch                                       | 1171.1                                          | 1168.7                                       |                                                                          |                                                 |                                              |
| CCCC stretch, [Ring] ip sym<br>stretch                                                              | 1210.6<br>1288<br>1299.8<br>1311.9              | 1207.3<br>1286.4<br>1303 (sh)<br>1311(sh)    |                                                                          |                                                 |                                              |

**Table S2: Subtended angles between the different atoms at 200 K, 290 K AND 320 K**

| (N-Nitrogen, Ni-Nickel, C-Carbon) |        |        |                |          |          |
|-----------------------------------|--------|--------|----------------|----------|----------|
| Atoms                             |        |        | Angle (degree) |          |          |
| Atom 1                            | Atom 2 | Atom 3 | T=320 K        | T=290 K  | T=200 K  |
| N1                                | Ni1    | N2     | 91.0(2)        | 90.7(2)  | 90.6(1)  |
| N1                                | Ni1    | N3     | 177.5(2)       | 177.3(1) | 177.4(1) |
| N1                                | Ni1    | N4     | 89.9(2)        | 90.2(1)  | 90.2(1)  |
| N1                                | Ni1    | N5     | 90.4(2)        | 90.1(2)  | 90.2(1)  |
| N1                                | Ni1    | N6     | 88.6(2)        | 88.4(1)  | 88.5(1)  |
| N2                                | Ni1    | N3     | 91.2(2)        | 91.8(2)  | 91.9(1)  |
| N2                                | Ni1    | N4     | 89.4(2)        | 89.5(1)  | 89.3(1)  |
| N2                                | Ni1    | N5     | 91.0(2)        | 91.0(2)  | 91.1(1)  |
| N2                                | Ni1    | N6     | 179.0(2)       | 178.9(2) | 178.4(1) |
| N3                                | Ni1    | N4     | 88.8(2)        | 88.9(1)  | 88.9(1)  |
| N3                                | Ni1    | N5     | 90.9(2)        | 90.9(2)  | 90.7(1)  |
| N3                                | Ni1    | N6     | 89.2(2)        | 89.1(1)  | 89.0(1)  |
| N4                                | Ni1    | N5     | 179.4(2)       | 179.5(2) | 179.4(1) |
| N4                                | Ni1    | N6     | 89.7(2)        | 89.8(1)  | 89.4(1)  |
| N5                                | Ni1    | N6     | 89.9(2)        | 89.7(2)  | 90.1(1)  |
| Ni1                               | N1     | C1     | 174.8(5)       | 174.4(4) | 175.2(3) |
| N1                                | C1     | S1     | 179.0(6)       | 178.7(4) | 179.0(3) |
| Ni1                               | N2     | C2     | 171.5(5)       | 170.5(4) | 168.4(3) |
| N2                                | C2     | S2     | 177.9(6)       | 178.5(5) | 178.5(3) |
| Ni1                               | N3     | C3     | 171.1(5)       | 172.0(4) | 172.5(3) |
| N3                                | C3     | S3     | 178.4(6)       | 179.1(5) | 178.5(3) |
| Ni1                               | N4     | C4     | 173.9(5)       | 173.3(4) | 172.6(3) |
| N4                                | C4     | S4     | 179.5(6)       | 179.5(4) | 179.5(3) |
| Ni1                               | N5     | C5     | 173.8(5)       | 173.9(4) | 173.0(3) |
| N5                                | C5     | S5     | 178.0(6)       | 178.8(5) | 178.8(3) |
| Ni1                               | N6     | C6     | 173.0(5)       | 170.9(4) | 169.6(3) |
| N6                                | C6     | S6     | 178.5(6)       | 179.6(4) | 179.6(3) |
